# Supplementary material for: Facile fabrication of g-C3N4/Bi2S3 coated melamine foam for oil/water separation applications
Source: Royal Society of Chemistry journal article supplement (doi:10.1039/d4ra07030e), 2024-01-01
Supplement: d4ra07030e1.pdf [file d4ra07030e1.pdf]

## Supporting Information

### Facile fabrication of g-C<sub>3</sub>N<sub>4</sub>/Bi<sub>2</sub>S<sub>3</sub> coated melamine foam for oil/water separation applications

Swathi A.C, Maneesh Chandran\*

<sup>a</sup> National Institute of Technology Calicut, Kerala, India, 673601

\*Corresponding author e-mail: [maneesh@nitc.ac.in](mailto:maneesh@nitc.ac.in)

### Preparation of g-C<sub>3</sub>N<sub>4</sub>/Bi<sub>2</sub>S<sub>3</sub>

#### Synthesis of g-C<sub>3</sub>N<sub>4</sub>

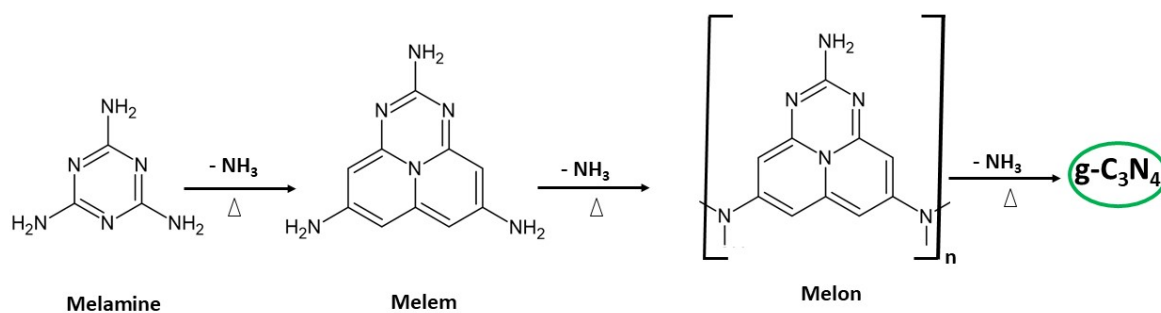

#### Synthesis of Bi<sub>2</sub>S<sub>3</sub>

The hydrothermal synthesis is used to synthesize Bi<sub>2</sub>S<sub>3</sub>.

The main precursors for the synthesis of Bi<sub>2</sub>S<sub>3</sub> are thiourea CS(NH<sub>2</sub>)<sub>2</sub>, bismuth nitrate pentahydrate (Bi(NO<sub>3</sub>)<sub>3</sub>·5H<sub>2</sub>O).

The general chemical equation for this hydrothermal synthesis of Bi<sub>2</sub>S<sub>3</sub> is;

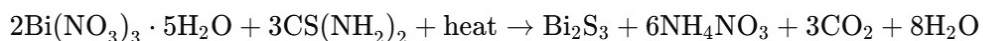

In a hydrothermal reaction, thiourea and bismuth nitrate pentahydrate can be combined in an aqueous solution under elevated temperature and pressure to synthesize bismuth sulfide nanostructures. This reaction typically occurs in a sealed autoclave, where thiourea acts as a sulfur source, decomposing into sulfide ions in solution.

In this process,  $\text{Bi}(\text{NO}_3)_3 \cdot 5\text{H}_2\text{O}$  provides the  $\text{Bi}^{3+}$  ions. The thiourea decomposes under hydrothermal conditions, releasing  $\text{S}^{2-}$  ions that combine with  $\text{Bi}^{3+}$  to form  $\text{Bi}_2\text{S}_3$ . Ammonium nitrate ( $\text{NH}_4\text{NO}_3$ ), carbon dioxide ( $\text{CO}_2$ ), and water ( $\text{H}_2\text{O}$ ) are byproducts.

Moreover, the combined action of furfuryl alcohol and HCl was used to tune the wettability property of  $\text{Bi}_2\text{S}_3$ . Due to the formation of poly(furfuryl alcohol) (PFA),  $\text{Bi}_2\text{S}_3$  becomes hydrophobic.

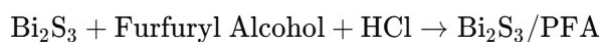

This reaction does not chemically alter  $\text{Bi}_2\text{S}_3$  but instead coats it, providing the desired surface properties through the PFA structure.

### Synthesis of $\text{g-C}_3\text{N}_4/\text{Bi}_2\text{S}_3$ binary composite

The binary composite is prepared using the hydrothermal method.

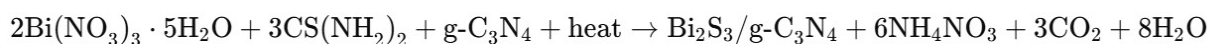

These are the basic chemical equations related to synthesizing the product.

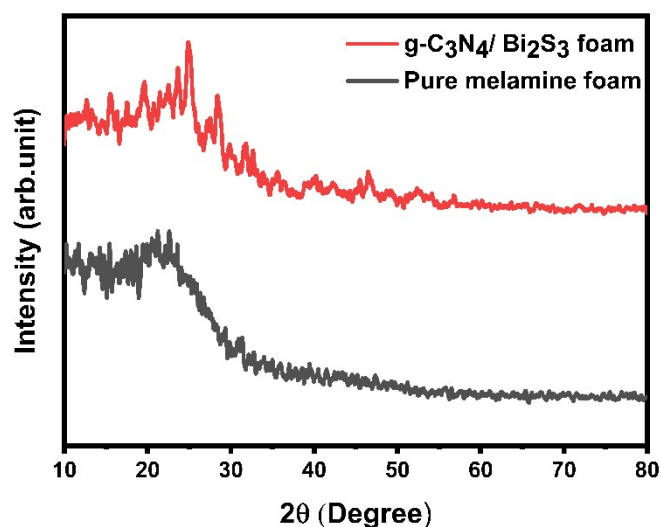

**Figure S1.** XRD patterns of pure melamine foam and  $\text{g-C}_3\text{N}_4/\text{Bi}_2\text{S}_3$  foam.

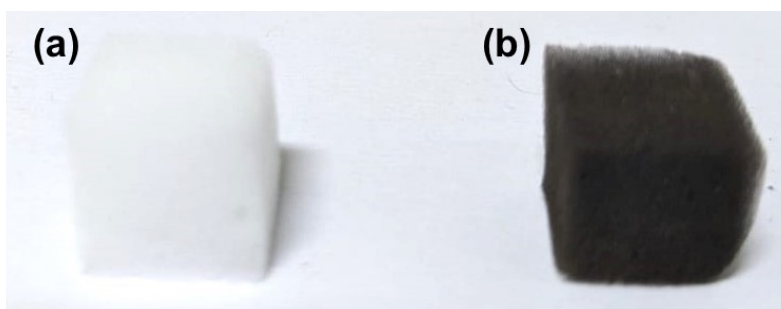

**Figure S2.** Photographs of pure melamine foam and g-C<sub>3</sub>N<sub>4</sub>/Bi<sub>2</sub>S<sub>3</sub> foam.

Figures S1 and S2 show the successful coating of g-C<sub>3</sub>N<sub>4</sub>/Bi<sub>2</sub>S<sub>3</sub> binary composite on pure melamine foam.

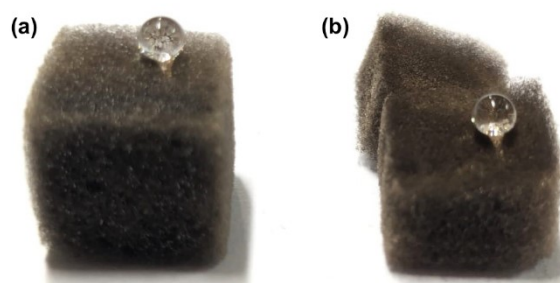

**Figure S3.** Wettability test (a) on the outer surface of the g-C<sub>3</sub>N<sub>4</sub>/Bi<sub>2</sub>S<sub>3</sub> foam and (b) the inner surface of g-C<sub>3</sub>N<sub>4</sub>/Bi<sub>2</sub>S<sub>3</sub> foam (foam cut into two parts and checked its wettability).

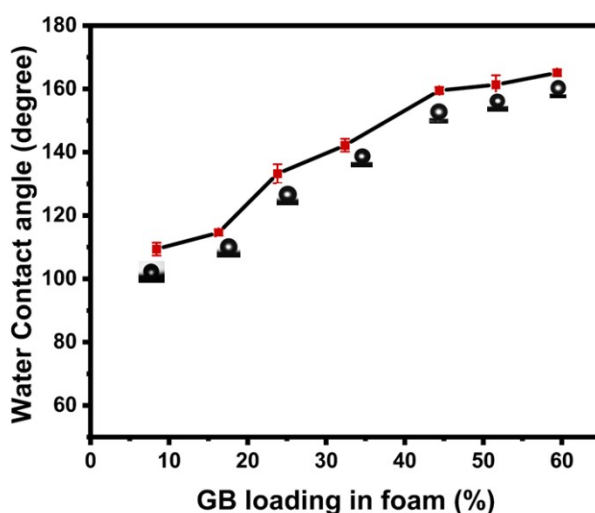

**Figure S4.** Water contact angle obtained for different GB loadings in the melamine foam.

The loading percentage of g-C<sub>3</sub>N<sub>4</sub>/Bi<sub>2</sub>S<sub>3</sub> was determined using Equation 1 by measuring the weight of the melamine foam before and after GB loading. Figure S4 depicts the WCA for the g-C<sub>3</sub>N<sub>4</sub>/Bi<sub>2</sub>S<sub>3</sub> foam at various particle-loading percentages. Increasing the nanoparticle

loading resulted in an increase in WCA; however, excessive loading eventually led to a reduction in oil absorption capacity due to particle-induced pore blockage.

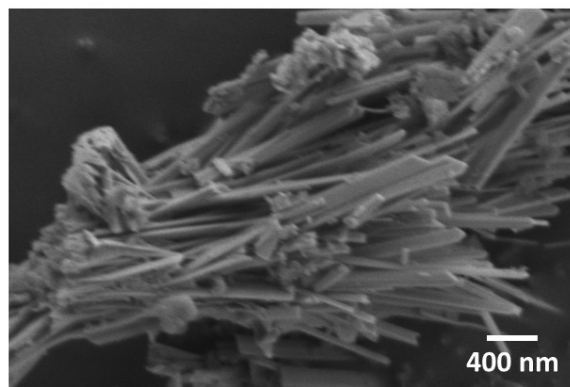

**Figure S5.** SEM image of g-C<sub>3</sub>N<sub>4</sub>/Bi<sub>2</sub>S<sub>3</sub> particles.

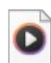

Video S5.mp4

**Video S6.** Engine oil removal from water using g-C<sub>3</sub>N<sub>4</sub>/Bi<sub>2</sub>S<sub>3</sub> foam.

The absorption capacity of the g-C<sub>3</sub>N<sub>4</sub>/Bi<sub>2</sub>S<sub>3</sub> foam was assessed by immersing it in water contaminated with engine oil and manually squeezing it. The g-C<sub>3</sub>N<sub>4</sub>/Bi<sub>2</sub>S<sub>3</sub> foam effectively absorbs the engine oil. Experimental results indicate that the g-C<sub>3</sub>N<sub>4</sub>/Bi<sub>2</sub>S<sub>3</sub> foam exhibits excellent recyclability, maintaining its oil removal efficiency even after 20 cycles, without any significant weight loss.

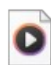

Video S6.mp4

**Video S7.** Continues engine oil/water separation using a peristaltic pump.

The video demonstrates a single-step separation of engine oil from water utilizing the GB foam. A continuous separation of 25 mL of engine oil was achieved using a peristaltic pump, without loss of loaded material.
